# Supplementary material for: “I Carry the Trauma and Can Vividly Remember”: Mental Health Impacts of the COVID-19 Pandemic on Frontline Health Care Workers in South Africa
Source: MDPI journal article supplement (doi:10.3390/ijerph20032365), 2023-01-29
Supplement: s1 [file s1]

## Supplementary materials

**Table S1:** Interview guide used during interviews with FHCWs

- 1. To understand how COVID-19 has impacted on the lives of front-line workers who provided services during the pandemic of COVID-19.**
  - Can you please tell me about the work you, department or ward, and how long you have been there?
  - Can you tell me about your job since the outbreak of COVID-19, has anything changed, if yes, how? (Probe about workload, and precautionary measures).
  - Can you comment on the support and other enablers that are provided for you to do your job now during COVID-19 pandemic?
  - What can be improved?
- 2. To explore how being in the frontline during the pandemic influenced dynamics in their relationships with partners and children.**
  - Can you tell me about your relationship with your family since the outbreak? (Probe about time spent at home or not).
  - Can you tell me about your relationship with your children, comparing it before and during the outbreak?
  - Can you tell me about your relationship with your partner/spouse, comparing it before and during the outbreak? (Probe: has it been affected in any way since the outbreak).
  - Please share with me instances of tensions and conflict with your significant others resulting from you working since the outbreak of Covid-19.
    - i. Probe, if they indicate experiences of conflict, ask to describe the kind of conflict and tension (was it verbal or physical)
    - ii. How was the conflict or tension resolved?
- 3. To understand the perceived impact of COVID-19 on mental health of frontline workers**
  - What are your worries and concerns related to your job since the outbreak? (Probe for worries specific to work).
  - What are your worries and concerns related to your family since the outbreak? (Probe for worries specific to family, children, spouse).
  - Can you comment on your physical well-being since the outbreak, has it changed in any way? (Probe how they are affected, and how they feel).
  - Can you comment on your emotional well-being since the outbreak, has it changed in any way? (Probe how they are affected, and how they feel).
  - Please describe the kind of help or assistance that you needed since the outbreak of Covid-19 for you to cope with being in the frontline.
  - What help have you sought to be able to cope and manage the stresses that came with being in the frontline during Covid-19?
  - What keeps you going?
- 4. To explore perceptions about COVID-19 vaccines**
  - We now have a vaccine and SA, has the arrival of vaccine changed the environment in the facility (or not)?
    - If yes or no, probe how?
  - How has the take-up of vaccine (or not) been in this facility (by staff and also the patients their seeing). Probe: why do you think that is?
  - Have you been vaccinated yet?
  - If yes, what influenced the decision to vaccinate?
  - If no, please can you share with me the reasons why you are not going to vaccinate?

- Probe: if it's about information, efficacy, anxiety or other structural reasons for not vaccinating
    - What are your worries and concerns about vaccinating?
    - What do your family think? Are they vaccinated?
    - What do your colleagues think? Are they vaccinated?
  - Please can you share with me what has influenced your decision to not vaccinate?
    - Probe on who, how the decision was influenced and whether there has been shifts over-time
  - What can be done to make you change your mind and go vaccinate?
    - Probe: who needs to do what, and how this can be done?
  - What are your thoughts about considerations of making uptake of COVID-19 vaccine mandatory?
5. **Explore experiences of stigma and discrimination as a frontline health care worker.**
- How has working in the frontline during the COVID-19 pandemic shaped your experiences of stigma or discrimination?
  - Can you share with me stories where you were stigmatized or discriminated against because of being a frontline worker during the COVID-19 pandemic.
  - Where did it (stigmatization and or discrimination) happen?
    - Within the health facility?
    - In the public spaces (e.g., shopping centres, taxi ranks)
    - At home or in the community
  - Would you say the stigmatization or discrimination intensified during specific periods during the pandemic? Please explain.
  - Now please tell me about how you responded to experiences of stigmatization or discrimination you experienced because of being a frontline HCW during the COVID-19 pandemic
  - How did being stigmatized and or discriminated against because of being a frontline HCWs make you feel?
  - Can you share your thoughts on what made some people stigmatized or discriminate frontline HCWs during the COVID-19 pandemic?

**Table S2:** Themes that emerged from the data

| Level 1                                        | Level 2                                                                       |
|------------------------------------------------|-------------------------------------------------------------------------------|
| Experiences of working in the COVID-19 Ward    | Working under pressure with no time to grieve the loss of colleagues          |
|                                                | Complexity of treating COVID-19 patients and feeling less in control          |
| Anxiety and fear of getting infected and death |                                                                               |
| Mental health impacts of COVID-19              | "I carry the trauma": distress of seeing patients 'dying like flies' everyday |
|                                                | Symptoms of poor mental health among FHCWs: 'not an easy journey'             |
| Impact on physical health                      |                                                                               |

|                                         |  |
|-----------------------------------------|--|
| Intrinsic motivation and peer support   |  |
| Institutional support provided to FHCWs |  |
